# Supplementary material
Source: HighWire-hosted journal article supplement (https://www.ajnr.org/highwire/filestream/52878/field_highwire_adjunct_files/0/16-00925.pdf)
Supplement: 16-00925.pdf [file 16-00925.pdf]

**On-line Table: Summary of patients with intracranial vascular narrowing or aneurysm**

| Age (yr) | Sex | Presentation                                                                   | Intracranial Findings                                                                                                       | Other Vascular Involvement                                                                       | Details                                                                                         | Diagnosis                           |
|----------|-----|--------------------------------------------------------------------------------|-----------------------------------------------------------------------------------------------------------------------------|--------------------------------------------------------------------------------------------------|-------------------------------------------------------------------------------------------------|-------------------------------------|
| 36       | F   | Left-sided hemiparesis and hemisensory loss from right hemispheric stroke      | Large-vessel occlusion from calcified embolus into right MCA; Developed chronic stenosis of right MCA as a result           | SCAs, CCAs, LVA, thoracic aorta, abdominal aorta                                                 |                                                                                                 | Chronic LVO                         |
| 42       | F   | Sudden-onset left-sided sensorineural hearing loss                             | Severe stenosis of bilateral carotid terminus extending into A1 and M1; basilar artery occlusion                            | SCAs, descending thoracic and abdominal aorta, visceral branches, renal arteries, iliac arteries | Common and internal carotid arteries not affected, no imaging evidence of acute ischemic stroke | Cerebral vasculitis                 |
| 52       | F   | Left-sided weakness from multiple right hemispheric strokes                    | Multifocal stenoses of the bilateral M2s, A2s, M3s, and A3s, basilar artery, vertebral arteries                             | SCAs                                                                                             | Common and internal carotid arteries not affected                                               | Cerebral vasculitis                 |
| 17       | F   | Migraine headaches and seizures                                                | Multifocal intracranial stenoses                                                                                            | Innominate, LCCA, thoracic and abdominal aorta, celiac artery                                    | Multiple chronic infarcts on MRI                                                                | Cerebral vasculitis                 |
| 29       | M   | Right-sided hemiparesis, sensory loss and aphasia from left-hemispheric stroke | Large-vessel occlusion from calcified embolus in left MCA; Additional intracranial narrowing at distal MCA and ACA branches | Thoracic and abdominal aorta, innominate, SCAs, LCCA, celiac, and SMAs                           | Internal carotid arteries not affected                                                          | Cerebral vasculitis and chronic LVO |
| 30       | F   | Acute-onset peripheral vision loss from right occipital stroke                 | Narrowing of right P1 and basilar artery                                                                                    | SCAs, SMA, RVA, bilateral ICA origins                                                            |                                                                                                 | Cerebral vasculitis                 |
| 52       | F   | Left-sided headaches and weakness, left parasagittal pontine infarct           | Basilar artery                                                                                                              | LSCA, LVA, abdominal aorta, bilateral iliac arteries                                             |                                                                                                 | Cerebral vasculitis                 |
| 32       | F   | Severe frontal headache and left-leg heaviness                                 | Basilar artery, left ICA, and distal bilateral ACAs and MCAs                                                                | ECAs, LVA, abdominal aorta, celiac artery, SMA                                                   | Reversal of vascular narrowings was present after 3 mo on MRA                                   | RCVS                                |
| 24       | F   | Sudden-onset left-sided weakness, right frontal infarct                        | Large-vessel occlusion M2                                                                                                   | CCAs, thoracic aorta                                                                             | Internal carotid arteries not affected                                                          | Chronic LVO                         |
| 50       | F   | Right-sided hemiparesis and hemisensory loss, TIAs                             | Unruptured 3-mm left cavernous carotid aneurysm                                                                             | Innominate, CCAs, and SCAs                                                                       | Chronic infarcts and white matter disease on MRI                                                | Saccular aneurysm                   |
| 47       | F   | Dizziness                                                                      | Unruptured 3-mm aneurysm at A1-A2 junction                                                                                  | Innominate, LCCA, RSCA                                                                           | Internal carotid and vertebral arteries not affected                                            | Saccular aneurysm                   |
| 66       | F   | Transient left visual field loss and headache, SAH                             | Ruptured 2-mm right VA aneurysm                                                                                             | R SCA, CCAs, abdominal aorta, celiac artery, SMA, renal arteries                                 | Internal carotid and vertebral arteries not affected                                            | Dissecting aneurysm                 |

**Note:**—CCA indicates common carotid artery; SCA, superior cerebellar artery; LVA, left vertebral artery; LCCA, left common carotid artery; SMA, superior mesenteric artery; RVA, right vertebral artery; ACA, anterior cerebral artery; ECA, external carotid artery; LSCA, left superior cerebellar artery; RSCA, right superior cerebellar artery; VA, vertebral artery; LVO, large vessel occlusion; RCVS, reversible cerebral vasoconstriction syndrome.
